# Supplementary material for: The use of clamping grips and friction pads by tree frogs for climbing curved surfaces
Source: PubMed Central journal article supplement (PMC5326540; doi:10.1098/rspb.2016.2867), 2017-02-22
Supplement: rspb20162867supp1.pdf [file rspb20162867supp1.pdf]

| Individual          | Mass (g)     | SVL (mm)     | Fore limb span (mm) |
|---------------------|--------------|--------------|---------------------|
| 1                   | 157          | 112          | 191                 |
| 2                   | 91           | 95           | 163                 |
| 3                   | 156          | 119          | 194                 |
| 4                   | 177          | 127          | 190                 |
| 5                   | 162          | 106          | 201                 |
| 6                   | 196          | 121          | 194                 |
| Average ( $\pm$ SD) | 157 $\pm$ 36 | 113 $\pm$ 12 | 189 $\pm$ 13        |

**S\_Tab\_ 1: Mass, snout-vent length (SVL) and fore limb span for the six Chinese gliding frogs (*Rhacophorus dennysi*).**

|           |  | overall effect                |                               |            |
|-----------|--|-------------------------------|-------------------------------|------------|
|           |  | limbs                         | surface                       |            |
| Pads      |  | $F_{1,64} = 35.29, P < 0.001$ | $F_{2,64} = 10.80, P < 0.001$ |            |
| Tubercles |  | $F_{1,64} = 3.23, P = 0.077$  | $F_{2,64} = 33.98, P < 0.001$ |            |
| Total     |  | $F_{1,64} = 0.20, P = 0.66$   | $F_{2,64} = 11.64, P < 0.001$ |            |
|           |  | pairwise comparison           |                               |            |
|           |  | flat-120 mm                   | flat-44 mm                    | 120-44 mm  |
| Pads      |  | $P > 0.05$                    | $P < 0.01$                    | $P < 0.01$ |
| Tubercles |  | $P < 0.001$                   | $P < 0.001$                   | $P > 0.05$ |
| Total     |  | $P < 0.01$                    | $P < 0.001$                   | $P > 0.05$ |

**S\_Tab\_ 2: Statistical results for testing the effects of limbs (fore & hind) and surface texture (smooth & anti-adhesive) on contact area of pads, tubercles and total area.** A 2-Way ANOVA with subsequent pairwise t-tests was used. Interactions of limbs with surface were not significant for all cases. P-values were adjusted for multiple comparisons using Bonferroni correction.

| <b>Friction force</b>      |                                   |             |
|----------------------------|-----------------------------------|-------------|
| Pads (pull) vs Tubs (pull) | $R = 1152, z = -1.17, N = 34, 39$ | $P > 0.05$  |
| Pads (push) vs Tubs (push) | $R = 958, z = -1.03, N = 31, 35$  | $P > 0.05$  |
| Pads (pull vs push)        | $R = 305, z = 2.32, N = 34, 31$   | $P = 0.04$  |
| Tubs (pull vs push)        | $R = 526, z = 3.91, N = 39, 35$   | $P < 0.001$ |
| <b>Contact area</b>        |                                   |             |
| Pads (pull) vs Tubs (pull) | $R = 1915, z = 5.5, N = 34, 39$   | $P < 0.001$ |
| Pads (push) vs Tubs (push) | $R = 1441, z = 5.16, N = 31, 35$  | $P < 0.001$ |
| Pads (pull vs push)        | $R = 410, z = 3.65, N = 31$       | $P < 0.001$ |
| Tubs (pull vs push)        | $R = 508, z = 3.16, N = 35$       | $P < 0.01$  |
| <b>Force per area</b>      |                                   |             |
| Pads (pull) vs Tubs (pull) | $R = 831, z = -4.72, N = 34, 39$  | $P < 0.001$ |
| Pads (push) vs Tubs (push) | $R = 672, z = -4.70, N = 31, 35$  | $P < 0.001$ |
| Pads (pull vs push)        | $R = 246, z = 0.98, N = 31$       | $P > 0.05$  |
| Tubs (pull vs push)        | $R = 250, z = -0.81, N = 35$      | $P > 0.05$  |

S\_Tab\_3: **Statistical results for friction on individual pads and tubercles.** For testing the effects of pulling and pushing, paired Wilcoxon tests were used. To test between pads and tubercles regular Wilcoxon test were applied. P-values were adjusted for multiple comparisons using the Bonferroni correction.

| <b>Adhesion force</b>           |                      |             |
|---------------------------------|----------------------|-------------|
| time of detachment              | $F_{2,157} = 20.66$  | $P < 0.001$ |
| structure                       | $F_{1,157} = 9.15$   | $P < 0.01$  |
| interactions                    | $F_{2,157} = 1.11$   | $P > 0.05$  |
| pads (initial vs after pull)    | $R = 65, z = -3.3$   | $P < 0.01$  |
| pads (after pull vs after push) | $R = 129, z = 3.15$  | $P < 0.01$  |
| tubs (initial vs after pull)    | $R = 43, z = -3.06$  | $P < 0.01$  |
| tubs (after pull vs after push) | $R = 120$            | $P < 0.001$ |
| Pads vs tubs (after pull)       | $R = 1078, z = 0.98$ | $P > 0.05$  |
| <b>Contact area</b>             |                      |             |
| time of detachment              | $F_{2,159} = 8.27$   | $P < 0.001$ |
| structure                       | $F_{1,159} = 151.44$ | $P < 0.001$ |
| interactions                    | $F_{2,159} = 3.79$   | $P < 0.05$  |
| pads (initial vs after pull)    | $R = 245, z = -0.06$ | $P > 0.05$  |
| pads (after pull vs after push) | $R = 135, z = 3.46$  | $P < 0.01$  |
| tubs (initial vs after pull)    | $R = 96$             | $P < 0.01$  |
| tubs (after pull vs after push) | $R = 110, z = -1.14$ | $P > 0.05$  |
| Pads vs tubs (after pull)       | $R = 1406, z = 5.6$  | $P < 0.001$ |
| <b>Force per area</b>           |                      |             |
| time of detachment              | $F_{2,157} = 9.42$   | $P < 0.001$ |
| structure                       | $F_{1,157} = 45.63$  | $P < 0.001$ |
| interactions                    | $F_{2,157} = 0.5$    | $P > 0.05$  |
| pads (initial vs after pull)    | $R = 52, z = -3.58$  | $P < 0.001$ |
| pads (after pull vs after push) | $R = 48, z = -1.03$  | $P > 0.05$  |
| tubs (initial vs after pull)    | $R = 44$             | $P > 0.05$  |
| tubs (after pull vs after push) | $R = 51, z = -2.83$  | $P < 0.01$  |
| Pads vs tubs (after pull)       | $R = 702, z = -4.3$  | $P < 0.001$ |

**S\_Tab\_ 4: Statistical results for adhesion on individual pads and tubercles.**

For the tests on adhesion, the Scheirer-Ray-Hare test (extension of Kruskal-Wallis ANOVA on ranks) was used to test the two factors, namely 1) time of detachment (initial detachment, detachment after pull and detachment after push) and 2) the structures investigated, i.e. pads and tubercles. Wilcoxon tests with adjusted P-values were used for post hoc comparisons.
